# Supplementary material for: Functional Dissection of the Proton Pumping Modules of Mitochondrial Complex I
Source: PubMed Central journal article supplement (PMC3160329; doi:10.1371/journal.pbio.1001128), 2011-08-23
Supplement: pbio.1001128.s006.pdf [file pbio.1001128.s006.pdf]

**Table S1:** *NADH:HAR oxidoreductase and inhibitor sensitive dNADH:DBQ oxidoreductase activities of mitochondrial membranes.*

| Strain               | NADH:HAR                                |     | dNADH:DBQ                               |     |
|----------------------|-----------------------------------------|-----|-----------------------------------------|-----|
|                      | oxidoreductase activity                 |     | oxidoreductase activity                 |     |
|                      | $\mu\text{mol min}^{-1} \text{mg}^{-1}$ | %   | $\mu\text{mol min}^{-1} \text{mg}^{-1}$ | %   |
| <i>parental</i>      | 0.96                                    | 100 | 0.53                                    | 100 |
| <i>nb8m</i> $\Delta$ | 1.04                                    | 108 | 0.16                                    | 30  |
